# Supplementary material for: Impact of some types of mass gatherings on current suicide risk in an urban population: statistical and negative binominal regression analysis of time series
Source: BMC Public Health. 2014 Apr 4;14:308. doi: 10.1186/1471-2458-14-308 (PMC4021406; doi:10.1186/1471-2458-14-308)
Supplement: Additional file 2: — Negative binominal regression models for the rates of suicidal behaviour in an urban population. [file 1471-2458-14-308-S2.xls]

## Sheet: Лист1
Additional file 2: Negative binominal regression models for the rates of suicidal behaviour in an urban population.
Negative binominal regression models for the rates of suicidal behaviour in an urban population
		Suicide attempt *		Suicides			Suicide-Related Behaviour
		female		male	female		male	female	total
(Intercept)	beta	-0.584		-1.003	-1.56		-0.481	-0.883	-5.176
	SE	0.168		0.105	0.279		0.125	0.04	1.86
	t	-3.47		-9.52	-5.59		-3.86	-22.18	-2.78
	p	0.001		0	0		0	0	0.005
Covariates
the average daily Dst index	beta	-0.009
	SE	0.003
	t	-3.35
	p	0.001
Minimal daily temperature C,	beta	0.021						0.014	0.012
	SE	0.004						0.004	0.003
	t	4.78						3.97	4.6
	p	0						0	0
Sunday†	beta			-1.553	-1.822		-0.753		-0.394
	SE			0.256	0.426		0.148		0.095
	t			-6.07	-4.27		-5.09		-4.14
	p			0	0		0		0
Monday†	beta			0.497			0.383		0.316
	SE			0.127			0.107		0.08
	t			3.92			3.58		3.95
	p			0			0		0
monthly inflation index	beta								0.052
	SE								0.019
	t								2.82
	p								0.005
in-migration	beta				-0.015		-0.007		-0.007
	SE				0.006		0.002		0.002
	t				-2.53		-2.83		-3.72
	p				0.012		0.005		0
international migration	beta	-0.356
	SE	0.105
	t	-3.38
	p	0.001
wage arrears per capita	beta	-1e-05
	SE	3e-06
	t	-3.07
	p	0.002
Mass gatherings (estimated 7-day period)
post factum defeat of local team at home	beta						0.371
	SE						0.118
	t						3.14
	p						0.002
post factum New Religious Movements mass event	beta			0.255			0.251		0.187
	SE			0.082			0.07		0.051
	t			3.12			3.59		3.66
	p			0.002			0		0
Model fit
Dispersion parameter:		9.38		7.81	971.93		48.81	22.29	17.99
Null deviance:		1929.6		2000.3	1054.5		2281.9	2130.4	2583.2
df1		2190		2190	2190		2190	2190	2190
Residual deviance:		1885.4		1840.8	999.4		2164.4	2113.5	2465.7
df2		2186		2183	2183		2181	2189	2180
Chi-square		44.2		159.5	55.1		117.5	16.9	117.5
df1-df2		4		7	7		9	1	10
Chi-square/(df1-df2)		11.05		22.79	7.87		13.06	16.9	11.75
Chi-square distribution		0		0	0		0	0	0
AIC:		3307		3319.2	1452		4055	3849	5633
Number of Fisher Scoring iterations 1. Robust standard errors computed using vcovHAC. This table shows only significant regression coefficients. *Male suicide attempt rate models were not significant. beta = regression coefficients; SE = standart error; t = t-value; p = probability; † = reference variable, Friday; AIC = Akaike information criterion.
